# Supplementary material for: Circulating Chemerin Levels, but not the RARRES2 Polymorphisms, Predict the Long-Term Outcome of Angiographically Confirmed Coronary Artery Disease
Source: PubMed Central journal article supplement (PMC6429458; doi:10.3390/ijms20051174), 2019-03-07
Supplement: ijms-20-01174-s001.pdf [file ijms-20-01174-s001.pdf]

**Supplementary Table 1.** Genome-wide significance for the association between *RARRES2* gene polymorphisms and chemerin levels

| SNP        | position  | Gene                | Function                  | Population | MA  | MAF   | HWE   | R <sup>2</sup> (%) | β     | SE    | <i>P</i> value <sup>a</sup> | Conditional <i>P</i> value <sup>b</sup> |
|------------|-----------|---------------------|---------------------------|------------|-----|-------|-------|--------------------|-------|-------|-----------------------------|-----------------------------------------|
| rs57888387 | 150307155 | <i>ACTR3C</i>       | intron                    | TWB        | A/G | 0.275 | 0.683 | 0.027              | 0.028 | 0.003 | 9.37 × 10 <sup>-17</sup>    | 0.274                                   |
| rs7781827  | 150311769 | <i>ACTR3C</i>       | intron                    | TWB        | C/T | 0.404 | 0.897 | 0.018              | 0.021 | 0.003 | 1.20 × 10 <sup>-11</sup>    | 0.802                                   |
| rs17837498 | 150312590 | <i>ACTR3C</i>       | intron                    | TWB        | A/G | 0.398 | 0.988 | 0.018              | 0.021 | 0.003 | 9.72 × 10 <sup>-12</sup>    | 0.872                                   |
| rs7806429  | 150316304 | <i>RARRES2</i>      | 3' UTR                    | TWB        | C/T | 0.386 | 1.000 | 0.022              | 0.023 | 0.003 | 3.48 × 10 <sup>-14</sup>    | 0.271                                   |
|            |           |                     |                           | CAD        | C/T | 0.379 | 0.986 | --                 | 0.020 | 0.011 | 0.082                       | --                                      |
| rs1962004  | 150323292 | <i>RARRES2</i>      | 3' UTR                    | TWB        | A/G | 0.268 | 0.608 | 0.034              | 0.032 | 0.003 | 1.54 × 10 <sup>-20</sup>    | 0.403                                   |
|            |           |                     |                           | CAD        | A/G | 0.257 | 0.454 | 0.006              | 0.024 | 0.012 | 0.044                       | --                                      |
| rs3735167  | 150342466 | <i>RARRES2</i>      | 5'UTR (-781) <sup>c</sup> | TWB        | T/C | 0.268 | 0.649 | 0.035              | 0.033 | 0.003 | 2.35 × 10 <sup>-21</sup>    | Lead SNP                                |
|            |           |                     |                           | CAD        | T/C | 0.254 | 0.290 | 0.007              | 0.024 | 0.012 | 0.038                       | --                                      |
| rs28432021 | 150349146 | <i>LOC107986858</i> | intron                    | TWB        | C/G | 0.264 | 0.552 | 0.031              | 0.031 | 0.004 | 3.50 × 10 <sup>-14</sup>    | 0.859                                   |
| rs1132261  | 150362898 | <i>LOC105375563</i> | NC transcript             | TWB        | G/A | 0.410 | 0.929 | 0.019              | 0.021 | 0.003 | 3.47 × 10 <sup>-12</sup>    | 0.350                                   |

TWB: Taiwan Biobank population; CAD: coronary artery disease; UTR: untranslated region; SNP: single nucleotide polymorphism; NC: noncoding, MA: minor allele; MAF: minor allele frequency; HWE: Hardy–Weinberg equilibrium; SE: standard error.

<sup>a</sup> *P* value: Adjusted for sex, age, body mass index, and current smoking status; Conditional *P* value: further adjustment of the lead SNP rs3735167.

<sup>b</sup> analyzed only in TWB;

<sup>c</sup> With transcription factor binding sites

**Supplementary Table 2.** *RARRES2* gene polymorphisms and chemerin levels in a cardiovascular health examination population previously reported [7]

| SNPs       | position  | Gene           | Location    | Function | MA  | MAF   | HWE   | $\beta$ (SE)   | R <sup>2</sup> (%) | <i>P</i> value <sup>a</sup> |
|------------|-----------|----------------|-------------|----------|-----|-------|-------|----------------|--------------------|-----------------------------|
| rs7806429  | 150316304 | <i>RARRES2</i> | 3' (+22014) | 3'UTR    | C/T | 0.410 | 0.841 | 0.027 (0.008)  | 0.017              | 0.001                       |
| rs1962004  | 150323292 | <i>RARRES2</i> | 3' (+15021) | 3'UTR    | A/G | 0.283 | 0.864 | 0.035 (0.008)  | 0.025              | $3.80 \times 10^{-5}$       |
| rs4721     | 150338437 | <i>RARRES2</i> | 3' (+3248)  | Intron   | T/G | 0.476 | 0.973 | 0.023 (0.008)  | 0.013              | 0.002                       |
| rs17173608 | 150339575 | <i>RARRES2</i> | 3' (+2110)  | Intron   | G/T | 0.067 | 0.899 | 0.002 (0.015)  | --                 | 0.912                       |
| rs3735167  | 150342466 | <i>RARRES2</i> | -781        | 5'UTR    | T/C | 0.282 | 1.000 | 0.038 (0.008)  | 0.026              | $5.27 \times 10^{-6}$       |
| rs10244748 | 150344521 | <i>RARRES2</i> | -2836       | 5'UTR    | C/T | 0.214 | 0.907 | -0.013 (0.009) | --                 | 0.174                       |
| rs10282458 | 150348213 | <i>RARRES2</i> | -6528       | 5'UTR    | A/G | 0.283 | 0.896 | 0.038 (0.008)  | 0.024              | $1.08 \times 10^{-5}$       |

Abbreviations as in Table 2.

<sup>a</sup> *P* values: adjusted for sex, age, body mass index, and current smoking status

**Supplementary Table 3.** Chemerin levels: stepwise linear regression analysis, including genotypes, in a cardiovascular health examination population previously reported [7]

| Variables                          | $\beta$ (SE)  | R <sup>2</sup> (%) | <i>P</i> value |
|------------------------------------|---------------|--------------------|----------------|
| Body mass index (BMI)              | 0.010 (0.002) | 0.064              | < 0.0001       |
| <i>RARRES2</i> rs3735167 genotypes | 0.038 (0.008) | 0.026              | < 0.0001       |
| Age                                | 0.002 (0.001) | 0.026              | < 0.0001       |
| Current smoker                     | 0.041 (0.014) | 0.007              | 0.005          |
| Sex                                | 0.026 (0.012) | 0.008              | 0.026          |

Abbreviations as in Table 2.

<sup>a</sup> The multiple linear regressions were adjusted for age, sex, current smoking status, BMI, and *RARRES2* rs3735167, rs7806429, and rs1962004 genotypes

**Supplementary Table 4.** Chemerin and C-reactive protein (CRP) levels according to the cardiovascular risk factors and severity of coronary artery disease (CAD)

|                   |        | Chemerin             |                              |                 | CRP                |                 |                 |
|-------------------|--------|----------------------|------------------------------|-----------------|--------------------|-----------------|-----------------|
|                   |        | Circulating levels   | <i>P1</i> value <sup>a</sup> | <i>P2</i> value | Circulating levels | <i>P1</i> value | <i>P2</i> value |
|                   |        | Means ± SD (N)       |                              |                 | Means ± SD (N)     |                 |                 |
| Sex*              | Male   | 130.56 ± 54.75 (387) | < 0.0001                     | < 0.0001        | 7.27 ± 20.17 (387) | 0.830           | 0.472           |
|                   | Female | 159.06 ± 66.10 (93)  |                              |                 | 8.25 ± 20.10 (92)  |                 |                 |
| Current smoker#   | No     | 134.28 ± 57.99 (363) | 0.136                        | 0.010           | 6.70 ± 19.17 (362) | 0.026           | 0.007           |
|                   | Yes    | 141.67 ± 58.57 (117) |                              |                 | 9.81 ± 22.87 (117) |                 |                 |
| Hypertension      | No     | 121.80 ± 51.92 (105) | 0.002                        | 0.007           | 7.68 ± 18.23 (105) | 0.841           | 0.916           |
|                   | Yes    | 140.07 ± 59.23 (375) |                              |                 | 7.40 ± 20.69 (374) |                 |                 |
| Diabetes mellitus | No     | 121.73 ± 44.79 (267) | < 0.0001                     | < 0.0001        | 6.09 ± 15.71 (267) | 0.024           | 0.018           |
|                   | Yes    | 154.07 ± 67.37 (213) |                              |                 | 9.19 ± 24.58 (212) |                 |                 |
| Obesity           | No     | 132.86 ± 59.53 (207) | 0.118                        | 0.042           | 9.79 ± 26.64 (207) | 0.744           | 0.995           |
|                   | Yes    | 138.52 ± 57.08 (273) |                              |                 | 5.69 ± 13.03 (272) |                 |                 |
| Dyslipidemia      | No     | 137.16 ± 61.46 (179) | 0.717                        | 0.764           | 7.67 ± 17.30 (178) | 0.066           | 0.092           |
|                   | Yes    | 135.11 ± 56.08 (292) |                              |                 | 6.40 ± 19.54 (292) |                 |                 |
| CAD severity      | SVD    | 121.68 ± 41.49 (134) |                              |                 | 5.28 ± 11.15 (134) |                 |                 |
|                   | DVD    | 141.49 ± 64.04 (135) | 0.015                        | 0.014           | 9.52 ± 26.52 (135) | 0.794           | 0.725           |
|                   | TVD    | 141.77 ± 61.83 (211) |                              |                 | 7.53 ± 19.84 (210) |                 |                 |

<sup>a</sup> *P1*: Not adjusted; *P2*: Multiple linear regressions adjusted for age and sex.

**Supplementary Table 5.** Combined chemerin and CRP levels associated with various clinical and biochemical parameters in CAD patients

| Subgroup (number)   |                                        | Total (481)          | Low + Low (347)      | Low + High or High + Low (103) | High + High (31)      | <i>P</i> Value <sup>a</sup> |
|---------------------|----------------------------------------|----------------------|----------------------|--------------------------------|-----------------------|-----------------------------|
| Anthropology        | Age (years)                            | 65.6 ± 11.3          | 65.1 ± 11.1          | 66.1 ± 11.1                    | 70.2 ± 13.2           | 0.046                       |
|                     | Body mass index (kg/m <sup>2</sup> )   | 26.0 ± 4.0           | 25.8 ± 3.6           | 26.9 ± 5.0                     | 24.8 ± 4.0            | 0.270                       |
|                     | Hypertension (%)                       | 78.2                 | 76.2                 | 80.6                           | 90.3                  | 0.158                       |
|                     | Diabetes mellitus (%)                  | 44.3                 | 37.7                 | 62.1                           | 58.1                  | 0.0002                      |
|                     | Current smokers (%)                    | 24.3                 | 23.8                 | 26.2                           | 25.8                  | 0.145                       |
|                     | Dyslipidemia (%)                       | 60.9                 | 62.0                 | 64.1                           | 35.5                  | 0.153                       |
| Renal function      | Creatinine (mg/dL)                     | 1.1 (0.9 - 1.3)      | 1.0 (0.9 - 1.1)      | 1.4 (1.0 - 2.3)                | 1.4 (1.2 - 1.8)       | < 0.0001                    |
|                     | eGFR (mL/min/1.86 m <sup>2</sup> )     | 69.7 ± 24.5          | 76.8 ± 18.3          | 50.1 ± 28.5                    | 50.9 ± 26.5           | < 0.0001                    |
| Blood cell counts   | Leukocyte counts (10 <sup>3</sup> /μL) | 6.6 ± 2.1            | 6.3 ± 1.6            | 6.9 ± 2.0                      | 9.7 ± 4.4             | < 0.0001                    |
|                     | Hematocrit (%)                         | 40.8 ± 5.4           | 42.1 ± 3.9           | 38.2 ± 6.7                     | 34.9 ± 7.3            | < 0.0001                    |
|                     | Platelet counts (10 <sup>3</sup> /μL)  | 211.9 ± 60.9         | 207.9 ± 48.6         | 218.7 ± 75.2                   | 230.8 ± 109.1         | 0.007                       |
| Inflammatory marker | CRP (mg/L)                             | 2.5 (1.2 - 4.3)      | 2.0 (1.0 - 3.2)      | 3.2 (1.9 - 7.1)                | 26.8 (16.2 - 84.2)    | < 0.0001                    |
|                     | Chemerin (ng/mL)                       | 124.4 (94.4 - 162.8) | 106.8 (89.1 - 132.7) | 187.8 (169.2 - 225.7)          | 211.3 (179.6 - 261.5) | < 0.0001                    |

Abbreviations as in Table 1.

<sup>a</sup> *P* values were adjusted for age, sex, body mass index, and current smoking status.

**Supplementary Table 6.** Association between *RARRES2* genotypes and chemerin levels in previous genome-wide association studies (GWASs) and in our studies

| References | Study Population                                         | Ethnicity/Country | No.  | Characteristics                                                | GWAS | SNPs in array                    | Lead <i>RARRES2</i> SNP | R <sup>2</sup> (%) | <i>P</i> value         |
|------------|----------------------------------------------------------|-------------------|------|----------------------------------------------------------------|------|----------------------------------|-------------------------|--------------------|------------------------|
| 14         | San Antonio Family Heart Study                           | Mexican-American  | 858  | Randomly sampled without regard to phenotype or disease status | +    | 542,944                          | NA                      | NA                 | NA                     |
| 13         | Sorbs cohort, KORA, PPP-Botnia study, LIFE Leipzig study | Germany           | 2791 | Non-diabetes                                                   | +    | 2,023,499                        | rs7806429               | 0.020              | $7.79 \times 10^{-14}$ |
| 15         |                                                          | Austria           | 495  | Underwent angiography <sup>a</sup>                             | +    | Cardio-metabolic chips (130,909) | rs3735167               | NA                 | 0.002                  |
| This study | Taiwan Biobank                                           | Han Chinese       | 2197 | Relatively healthy general population                          | +    | 614,820                          | rs3735167               | 0.035              | $2.35 \times 10^{-21}$ |
| 7          |                                                          | Han Chinese       | 612  | Cardiovascular health examination                              | -    | --                               | rs3735167               | 0.026              | $5.27 \times 10^{-6}$  |
| This study |                                                          | Han Chinese       | 481  | Angiographically confirmed CAD                                 | -    | --                               | rs3735167               | 0.007              | 0.038                  |

SNP: single nucleotide polymorphism; NA: not available.

<sup>a</sup> Including patients with significant coronary artery disease (CAD) (247) and nonsignificant CAD (248).

# Supplementary Figure 1A and 1B

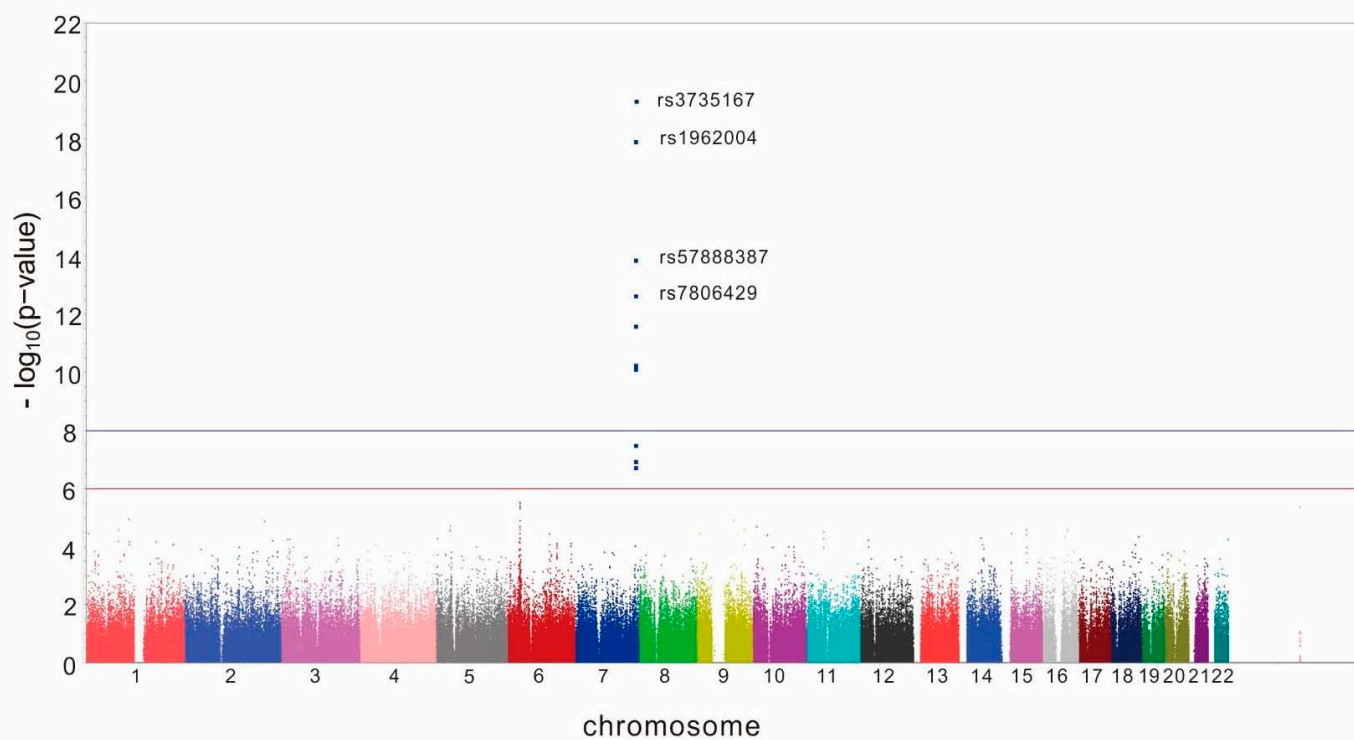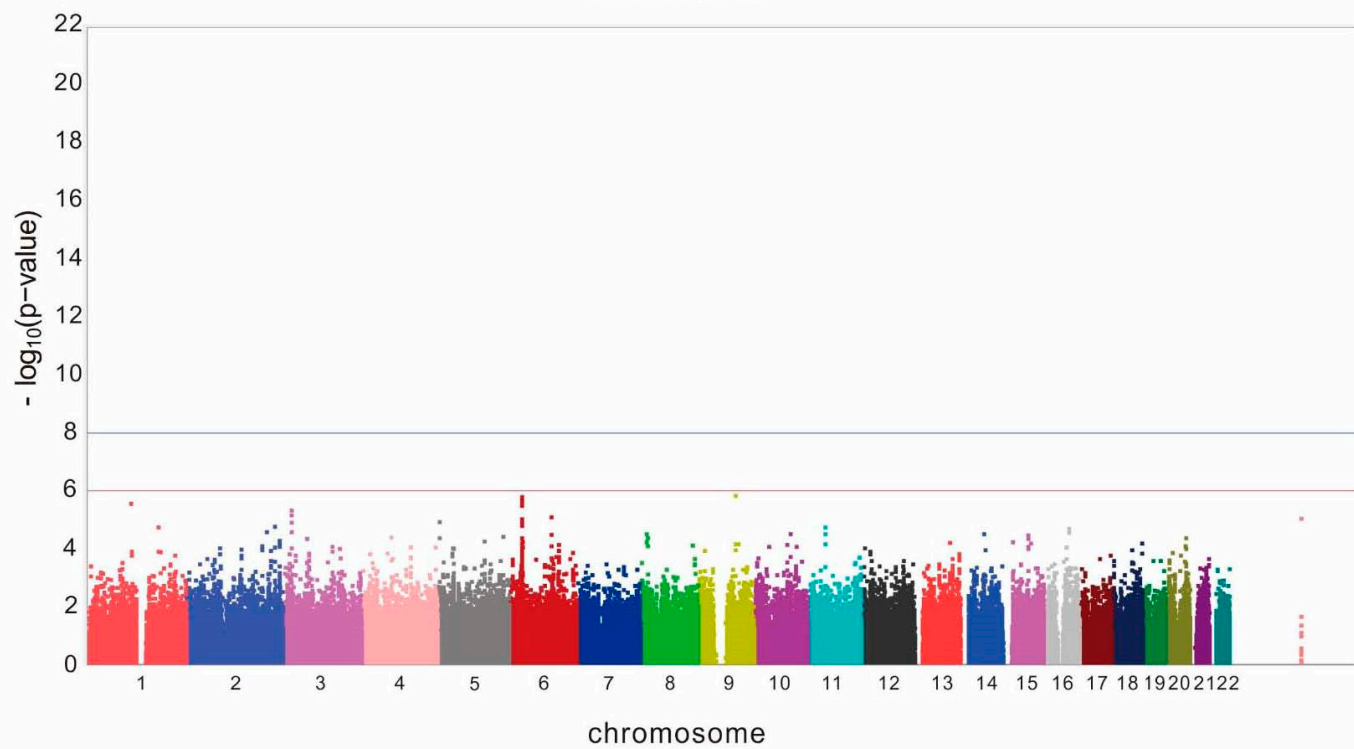

## Supplementary Figure 2

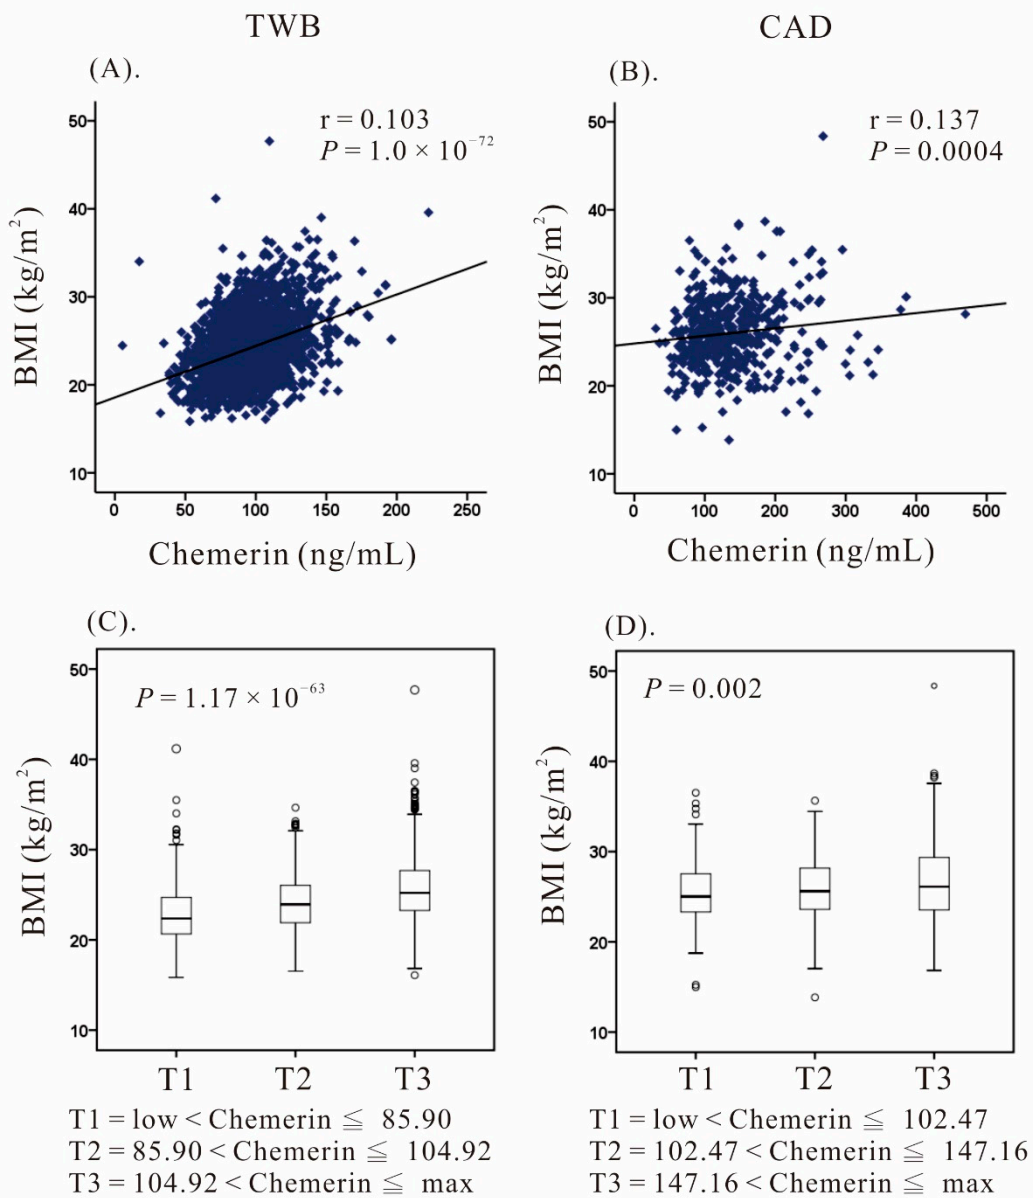



# Supplementary Figure 3

(A). All-cause mortality

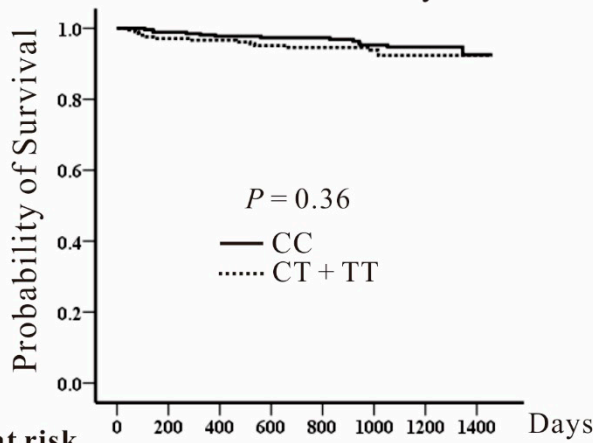

No. at risk

|        |     |     |     |    |    |
|--------|-----|-----|-----|----|----|
| CC:    | 269 | 258 | 205 | 91 | 35 |
| CT+TT: | 209 | 200 | 163 | 55 | 23 |

(B). Secondary end point

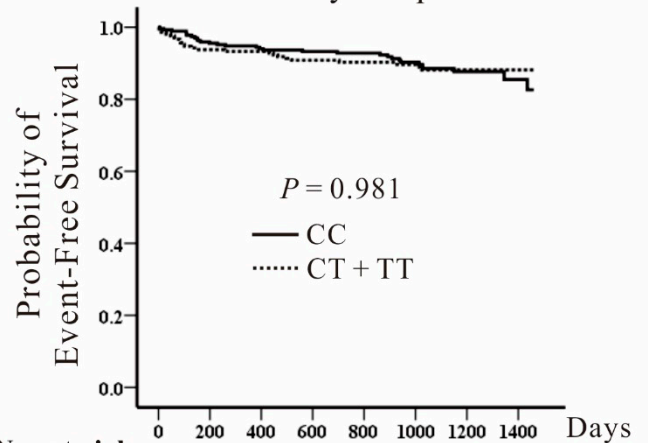

No. at risk

|        |     |     |     |    |    |
|--------|-----|-----|-----|----|----|
| CC:    | 269 | 248 | 194 | 83 | 31 |
| CT+TT: | 209 | 193 | 157 | 53 | 23 |

(C). All-cause mortality

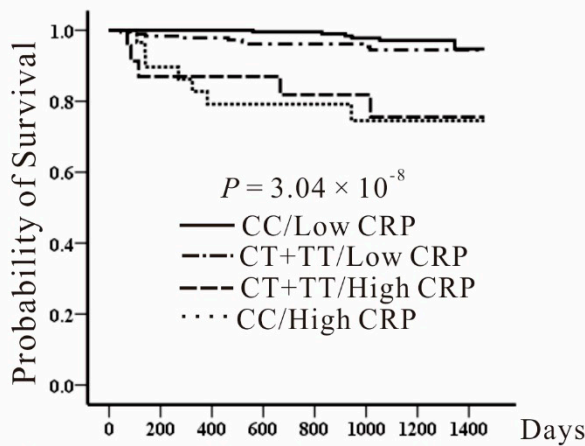

|                 |     |     |     |    |    |
|-----------------|-----|-----|-----|----|----|
| CC/Low CRP:     | 238 | 234 | 183 | 83 | 31 |
| CT+TT/Low CRP:  | 186 | 180 | 147 | 50 | 22 |
| CT+TT/High CRP: | 23  | 20  | 16  | 5  | 1  |
| CC/High CRP:    | 29  | 22  | 20  | 8  | 4  |

(D). Secondary end point

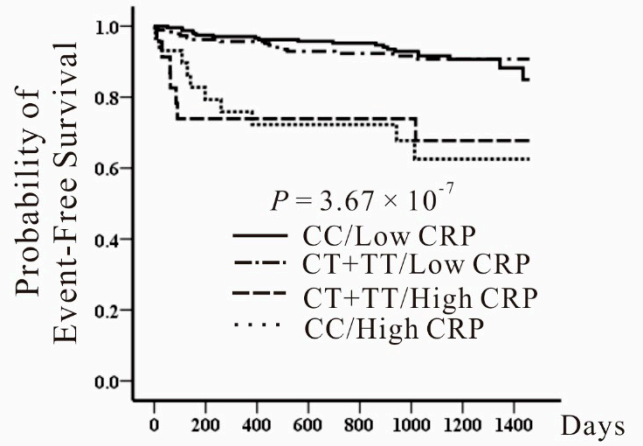

|                 |     |     |     |    |    |
|-----------------|-----|-----|-----|----|----|
| CC/Low CRP:     | 238 | 226 | 173 | 76 | 28 |
| CT+TT/Low CRP:  | 186 | 176 | 142 | 49 | 22 |
| CT+TT/High CRP: | 23  | 17  | 15  | 4  | 1  |
| CC/High CRP:    | 29  | 20  | 19  | 7  | 3  |

## Supplementary Figure Legend

Supplementary Figure 1. Manhattan plots of the genome-wide association study for chemerin levels.

Manhattan plots of the genome-wide association study for chemerin levels without (A) or with (B) conditional analysis of the rs3735167 polymorphism. The general linear model was used to examine the association between single nucleotide polymorphisms and chemerin levels after adjustment for age, sex, body mass index, and current smoking status. The blue and red dashed horizontal lines revealed a  $-\log_{10}(P \text{ value})$  of 8 and 6, respectively.

Supplementary Figure 2. Association between BMI and circulating chemerin levels in TWB population and patients with angiographically confirmed coronary artery disease (A, B); Association between BMI and tertiles of circulating chemerin levels were presented as Box and whisker plots analysis (C, D).

*P* value: Adjusted for sex, age and current smoking status. Abbreviations as in Table 1.

Supplementary Figure 3. Kaplan–Meier curves of the cumulative incidence of primary and secondary endpoints. Kaplan–Meier curves of the cumulative incidence of primary and secondary endpoints according to the rs3735167 genotypes. No significant difference was found between the rs3735167 genotype and long-term outcomes of CAD patients in the total study population (A, B) or in subgroups according to C-reactive protein (CRP) levels (C, D).
